# Supplementary material
Source: ML conference proceedings conference paper supplement (https://openreview.net/forum?id=zEHGSN8Hy8)
Supplement: supplementary_material [file attachment]

```

from rank_bm25 import BM25Okapi
import random
import numpy as np
from sklearn.metrics import precision_recall_fscore_support
from sklearn.metrics import accuracy_score
import pandas as pd
import pickle

def BM25_eval(df):
    n_sample = 20
    df.drop_duplicates()
    # step 1. get samples and pool
    sample_d = {}
    pool_txt = []
    txt = set(df.utterance)
    n_d = {}
    for i in set(df.label):
        sample_d[i] = random.sample( set(df[df.label==i].utterance), n_sample )
        pool_txt_i = txt - set(sample_d[i])
        n_d[i] = len(pool_txt_i)
        pool_txt += list( pool_txt_i )
    pool_df = pd.DataFrame({"utterance":pool_txt})

    # get scores
    inter_dfi = {}
    diff_dfi = {}
    for i in set(df.label):
        txt_score = []
        bm25_i = BM25Okapi([s.split(" ") for s in sample_d[i]])
        for t in pool_txt:
            txt_score.append( bm25_i.get_scores(t.split(" ")).mean() )
        txt_score = np.array(txt_score)

        # intersection
        idx = (-txt_score.argsort()[ :n_d[i]])
        inter_dfi[i] =
df[df.utterance.isin( pool_df.iloc[idx].utterance.to_list() )]

        # difference
        top_n_diff = len(pool_txt) - n_d[i]
        idx = (txt_score.argsort()[ :top_n_diff])
        diff_dfi[i] =
df[df.utterance.isin( pool_df.iloc[idx].utterance.to_list() )]

```

```

# evaluate
pred_label_inter = []
true_label_inter = []
pred_label_diff = []
true_label_diff = []
for i in set(df.label):
    # inter
    pred_label_inter += [i] * inter_dfi[i].shape[0]
    true_label_inter += inter_dfi[i].label.to_list()
    # diff
    other_labels = set(df.label) - set([i])
    replace = {l: f"not_{i}" for l in other_labels}
    diff_dfi[i] = diff_dfi[i].replace({"label": replace})
    pred_label_diff += [f"not_{i}"] * diff_dfi[i].shape[0]
    true_label_diff += diff_dfi[i].label.to_list()
    res_inter = precision_recall_fscore_support(true_label_inter,
pred_label_inter, average='weighted', zero_division=0.0)
    acc_inter = accuracy_score(true_label_inter, pred_label_inter,
normalize=True)
    res_inter = (acc_inter,) + res_inter[:2] +
(2*res_inter[0]*res_inter[1]/(res_inter[0] + res_inter[1]),)

    res_diff = precision_recall_fscore_support(true_label_diff, pred_label_diff,
average='weighted', zero_division=0.0)
    acc_diff = accuracy_score(true_label_diff, pred_label_diff, normalize=True)
    res_diff = (acc_diff,) + res_diff[:2] +
(2*res_diff[0]*res_diff[1]/(res_diff[0] + res_diff[1]),)
    return res_inter, res_diff

def BM25_eval_n_rep(df, n_rep):
    res_inter = np.zeros([n_rep, 4])
    res_diff = np.zeros([n_rep, 4])
    for i in range(n_rep):
        res_inter[i], res_diff[i] = BM25_eval(df)
    res_inter = pd.DataFrame(res_inter, columns=['acc', 'precision', 'recall',
'F1'])
    res_inter = res_inter.mean().to_frame('Intersection').T

    res_diff = pd.DataFrame(res_diff, columns=['acc', 'precision', 'recall',
'F1'])
    res_diff = res_diff.mean().to_frame('Difference').T
    return res_inter, res_diff

df_dir = "data/ag_news/description_3000.csv"

```

```
df_dirs = ["data/ag_news/title_3000.csv", "data/ag_news/description_3000.csv",  
"data/FPB/all.csv", "data/banking77/all.csv", "data/fb/en_all.csv"]  
df_tags = ["AGT", "AGD", "FPB", "Banking77", "FMTOD"]  
n_rep = 5  
res_dict = {}  
for i in range(len(df_dirs)):  
    df = pd.read_csv(df_dirs[i])  
    res_inter, res_diff = BM25_eval_n_rep(df, n_rep)  
    res_dict[df_tags[i]] = pd.concat([res_inter, res_diff])  
  
    with open(f'results/res_BM25_{df_tags[i]}.pickle', 'wb') as f:  
        pickle.dump(res_dict, f)  
  
print("Done!")
```
