# Supplementary material
Source: ML conference proceedings conference paper supplement (https://openreview.net/forum?id=zEHGSN8Hy8)
Supplement: supplementary_material [file attachment]

```

import random
import numpy as np
from sklearn.metrics import precision_recall_fscore_support
from sklearn.metrics import accuracy_score
import pandas as pd
from transformers import DPRQuestionEncoder, DPRQuestionEncoderTokenizer
import torch.nn.functional as F
from datasets import load_dataset
from torch.utils.data.dataloader import DataLoader
import torch
from tqdm import tqdm
import string
import os
import shutil
import pickle

def id_generator(size=6):
    return ''.join(random.choice(string.ascii_uppercase + string.digits) for _ in
range(size))

def DPR_eval(df, tokenizer, model):
    temp_code = id_generator(4)
    data_tempdir = 'data/temp_' + temp_code

    if not os.path.exists(data_tempdir):
        os.makedirs(data_tempdir)

    n_sample = 20
    df.drop_duplicates()
    # step 1. get samples and pool
    sample_d = {}
    pool_txt = []
    txt = set(df.utterance)
    n_d = {}
    for i in set(df.label):
        sample_d[i] = random.sample( set(df[df.label==i].utterance), n_sample )
        sample_df = pd.DataFrame({"utterance":sample_d[i]})
        sample_df.to_csv(data_tempdir+"/sample_{i}_temp.csv", index=False)
        pool_txt_i = txt - set(sample_d[i])
        n_d[i] = len(pool_txt_i)
        pool_txt += list( pool_txt_i )
    pool_df = pd.DataFrame({"utterance":pool_txt})
    pool_df.to_csv(data_tempdir+"/pool_temp.csv", index=False)

```

```

# get embeddings of pool and samples
inter_dfi = {}
diff_dfi = {}
sample_emb = {}
pool_emb = get_emb(data_tempdir+"/pool_temp.csv", tokenizer, model)
for i in set(df.label):
    sample_emb[i] = get_emb(data_tempdir+"/sample_{i}_temp.csv", tokenizer,
model)

    cossim_mat = F.normalize(pool_emb) @ F.normalize(sample_emb[i]).t()
    cossim = cossim_mat.mean(dim=1)

# intersection
idx = (-coossim.argsort()[ :n_d[i]])
inter_dfi[i] =
df[df.utterance.isin( pool_df.iloc[idx].utterance.to_list() )]

# difference
top_n_diff = len(pool_txt) - n_d[i]
idx = (coossim.argsort()[ :top_n_diff])
diff_dfi[i] =
df[df.utterance.isin( pool_df.iloc[idx].utterance.to_list() )]

# evaluate
pred_label_inter = []
true_label_inter = []
pred_label_diff = []
true_label_diff = []
for i in set(df.label):
    # inter
    pred_label_inter += [i] * inter_dfi[i].shape[0]
    true_label_inter += inter_dfi[i].label.to_list()
    # diff
    other_labels = set(df.label) -set([i])
    replace = {l: f"not_{i}" for l in other_labels}
    diff_dfi[i] = diff_dfi[i].replace({"label": replace})
    pred_label_diff += [f"not_{i}"] * diff_dfi[i].shape[0]
    true_label_diff += diff_dfi[i].label.to_list()
    res_inter = precision_recall_fscore_support(true_label_inter,
pred_label_inter, average='weighted', zero_division=0.0)
    acc_inter = accuracy_score(true_label_inter, pred_label_inter,
normalize=True)
    res_inter = (acc_inter,) + res_inter[:2] +
(2*res_inter[0]*res_inter[1]/(res_inter[0] + res_inter[1]),)

```

```

    res_diff = precision_recall_fscore_support(true_label_diff, pred_label_diff,
average='weighted', zero_division=0.0)
    acc_diff = accuracy_score(true_label_diff, pred_label_diff, normalize=True)
    res_diff = (acc_diff,) + res_diff[:2] +
(2*res_diff[0]*res_diff[1]/(res_diff[0] + res_diff[1]),)

```

```

    shutil.rmtree(data_tempdir)
    return res_inter, res_diff

```

```

def get_emb(data_path, tokenizer, model):
    model.to('cuda')
    dataset = load_dataset('csv', data_files=data_path)
    key = list(dataset.keys())[0]
    dataset = dataset[key]
    dataloader = DataLoader(dataset, batch_size=8, shuffle=False)
    embedding_ls = []
    for step, data in enumerate(tqdm(dataloader)):
        inputs = tokenizer(data['utterance'], truncation=True, padding=True,
return_tensors='pt')
        inputs.to('cuda')
        emb = model(**inputs, output_hidden_states=True,
return_dict=True).pooler_output.clone().detach().to('cpu')
        embedding_ls.append( emb )
    embedding = torch.cat( embedding_ls )
    return embedding

```

```

def DPR_eval_n_rep(df, n_rep):
    tokenizer = DPRQuestionEncoderTokenizer.from_pretrained('facebook/dpr-
question_encoder-single-nq-base')
    model = DPRQuestionEncoder.from_pretrained('facebook/dpr-question_encoder-
single-nq-base', return_dict=True)
    res_inter = np.zeros([n_rep, 4])
    res_diff = np.zeros([n_rep, 4])
    for i in range(n_rep):
        res_inter[i], res_diff[i] = DPR_eval(df, tokenizer, model)
    res_inter = pd.DataFrame(res_inter, columns=['acc', 'precision', 'recall',
'F1'])
    res_inter = res_inter.mean().to_frame('Intersection').T

    res_diff = pd.DataFrame(res_diff, columns=['acc', 'precision', 'recall',
'F1'])
    res_diff = res_diff.mean().to_frame('Difference').T
    return res_inter, res_diff

```

```

df_dir = "data/ag_news/description_3000.csv"

```

```
df_dirs = ["data/ag_news/title_3000.csv", "data/ag_news/description_3000.csv",  
"data/FPB/all.csv", "data/banking77/all.csv", "data/fb/en_all.csv"]  
df_tags = ["AGT", "AGD", "FPB", "Banking77", "FMTOD"]  
n_rep = 5  
res_dict = {}  
for i in range(len(df_dirs)):  
    df = pd.read_csv(df_dirs[i])  
    res_inter, res_diff = DPR_eval_n_rep(df, n_rep)  
    res_dict[df_tags[i]] = pd.concat([res_inter, res_diff])  
  
    with open(f'results/res_DPR_{df_tags[i]}.pickle', 'wb') as f:  
        pickle.dump(res_dict, f)  
  
print("Done!")
```
