# Supplementary material
Source: ML conference proceedings conference paper supplement (https://openreview.net/forum?id=zEHGSN8Hy8)
Supplement: supplementary_material [file attachment]

```

import pandas as pd
import numpy as np
from sklearn.metrics import precision_recall_fscore_support
import logging
import setops_sup
from transformers import AutoConfig, AutoModel, AutoTokenizer, PreTrainedModel
import torch
import random
import os
import argparse
import string

# set up logging info
logging.basicConfig(level=logging.INFO)
logger = logging.getLogger(__name__)

def set_seed(seed):
    """ Set all seeds to make results reproducible """
    torch.manual_seed(seed)
    torch.cuda.manual_seed_all(seed)
    torch.backends.cudnn.deterministic = True
    torch.backends.cudnn.benchmark = False
    np.random.seed(seed)
    random.seed(seed)
    os.environ['PYTHONHASHSEED'] = str(seed)

def id_generator(size=6):
    return ''.join(random.choice(string.ascii_uppercase + string.digits) for _ in
range(size))

def eval_SemSOC_intersect(df, model_name, data_tempdir, model_tempdir,
n_sample=50, n_intent=3, top_k=1, train_epoch=40, local_files_only=False,
temp=0.05):
    args = setops_sup.Training_args(model_name=model_name, bs=48,
train_epoch=train_epoch, output_dir=model_tempdir, temp=temp)
    trainer = setops_sup.SemSOCTrainer(args, local_files_only=local_files_only)

    intents = list(df.label.value_counts().index)
    intents = intents[:n_intent]
    sampleset_dict = dict()
    sampleset_ls = []

    # prepare the sample sets and pool set
    pool = []

```

```

for intent in intents:
    dfi = df[df['label']==intent].sample(frac=1)
    sample = dfi.iloc[:n_sample]
    sample.to_csv(data_tempdir+f'/{intent}.csv', index=False)
    sample_set = setops_sup.Set(data_path=data_tempdir+f'/{intent}.csv')
    sampleset_dict[intent] = sample_set
    sampleset_ls.append(sample_set)
    pool.append(dfi.iloc[n_sample:])
pool_df = pd.concat(pool).sample(frac=1)
pool_df.to_csv(data_tempdir+'/pool.csv', index=False)
pool = setops_sup.Set(data_path=data_tempdir+'/pool.csv')
counts = pool_df.label.value_counts()

# do SemSOC training
trainer.SemSOCtrain(sampleset_ls)

# get tokenizer and model
tokenizer = AutoTokenizer.from_pretrained(args.model_name)
model = AutoModel.from_pretrained(args.output_dir)

# do intersection
pool_set_ls= []
for intent in intents:
    idx, cossim = pool.intersect(sampleset_dict[intent], tokenizer, model,
top_k=top_k, debug=True)
    pool_df[f'cossim_{intent}'] = cossim
    pool_set = pool_df.iloc[idx]
    n = counts[intent]
    pool_set = pool_set.iloc[:n]
    pool_set['pred'] = intent
    pool_set_ls.append(pool_set)
pool_set = pd.concat(pool_set_ls)
res = precision_recall_fscore_support(pool_set['label'].to_list(),
pool_set['pred'].to_list(), average='weighted')
acc =
pool_set[pool_set['label']==pool_set['pred']].shape[0]/pool_set.shape[0]
return (acc,) + res[:3]

def n_rep_eval(df, model_name, n_sample=50, n_intent=3, top_k=1, train_epoch=40,
local_files_only=False, temp=0.05, n_rep=5):

    temp_code = id_generator(4)
    data_tempdir = 'data/temp_' + temp_code
    model_tempdir = 'models/temp_' + temp_code

```

```

if not os.path.exists(data_tempdir):
    os.makedirs(data_tempdir)

if not os.path.exists(model_tempdir):
    os.makedirs(model_tempdir)

inter_res_sup = np.zeros([n_rep, 4])
for i in range(n_rep):
    inter_res_sup[i] = eval_SemSOC_intersect(df, model_name, data_tempdir,
model_tempdir, n_sample=n_sample, n_intent=n_intent, top_k=top_k,
train_epoch=train_epoch, local_files_only=local_files_only, temp=temp)

inter_res_sup = inter_res_sup.mean(axis=0)
#print(inter_res_sup)

return inter_res_sup

# Step 1. Read arguments:
parser = argparse.ArgumentParser()
parser.add_argument("-mn", "--model_name", default='princeton-nlp/sup-simcse-
bert-base-uncased', help="Name of the model for evaluation")
parser.add_argument("-dp", "--data_path", default='data/agnews/title_3000.csv',
help="Dataset for evaluation")
parser.add_argument("-nr", "--n_rep", default=5, help="Number to times to repeat
each experiment.")
parser.add_argument("-te", "--train_epoch", default=60, help="Number of training
epoch.")
parser.add_argument("-ni", "--n_intent", default=3, help="Number of sample set.")
parser.add_argument("-ns", "--n_sample", default=20, help="Sample set size.")
# parser.add_argument("-tp", "--temp", default=0.05, help="Temperature
parameter.")
args = parser.parse_args()

data_path = args.data_path
df = pd.read_csv(data_path)
# ['data/fb/en_all.csv', 'data/agnews/title_3000.csv',
'data/agnews/description_3000.csv', 'data/FPB/all.csv']
# ["princeton-nlp/sup-simcse-bert-base-uncased", "princeton-nlp/sup-simcse-
roberta-base", "voidism/diffcse-bert-base-uncased-sts", "voidism/diffcse-roberta-
base-sts"]

```

```

n_rep = int(args.n_rep)
n_sample = int(args.n_sample)
n_intent = int(args.n_intent)
top_k = n_sample
train_epoch = int(args.train_epoch)
model_name = args.model_name
if 'MCSE' in model_name:
    local_files_only = True
elif 'contriever' in model_name:
    local_files_only = True
# elif 'simcse' in model_name:
#     local_files_only = True
else:
    local_files_only = False

# Step 3. Do hyperparameter tuning on temperature
set_seed(1)

temps = [0.001, 0.01, 0.05, 0.1, 1]
# temps = [0.05]
res_ls = []
for temp in temps:
    res = n_rep_eval(df, model_name, n_sample=n_sample, n_intent=n_intent,
top_k=top_k, train_epoch=train_epoch, local_files_only=local_files_only,
temp=temp, n_rep=n_rep)
    res_ls.append(res)

print(f"temps are {temps}.")
print(res_ls)

print("Done!")

```
